# Supplementary material
Source: PubMed Central journal article supplement (PMC10992487)
Supplement: 262_2021_2890_MOESM1_ESM.pdf [file 262_2021_2890_MOESM1_ESM.pdf]

Supplementary table 1. Association of PD-L1 expression with clinicopathological characteristics in a subset of 74 patients with UTUC

|                          | PD-L1 CPS $\geq$ 10   | PD-L1 CPS < 10       | p value |
|--------------------------|-----------------------|----------------------|---------|
|                          | <i>N</i> (%)          | <i>N</i> (%)         |         |
| Patient number           | 16 (22)               | 58 (78)              |         |
| Follow duration          | 15.47 $\pm$ 12.4 (mo) | 19.0 $\pm$ 11.2 (mo) | 0.273   |
| Age                      |                       |                      |         |
| > 65 yr                  | 7 (43.8)              | 42 (72.4)            | 0.041*  |
| $\leq$ 65 yr             | 9 (56.2)              | 16 (27.6)            |         |
| Gender                   |                       |                      | 0.258   |
| Male                     | 10 (62.5)             | 25 (43.1)            |         |
| Female                   | 6 (37.5)              | 33 (56.9)            |         |
| Pathologic stage         |                       |                      | 0.09    |
| pTa/is                   | 0 (0)                 | 13 (22.4)            |         |
| pT1                      | 3 (18.8)              | 9 (15.5)             |         |
| pT2                      | 5 (31.2)              | 10 (17.2)            |         |
| pT3                      | 7 (43.8)              | 20 (34.5)            |         |
| pT4                      | 1 (6.2)               | 6 (10.3)             |         |
| Muscle-invasive tumor    |                       |                      | 0.233   |
| < T2                     | 3 (18.8)              | 22 (37.9)            |         |
| $\geq$ T2                | 13 (81.2)             | 36 (62.1)            |         |
| Lymph node status        |                       |                      | 0.138   |
| N0/Nx                    | 11 (68.8)             | 50 (86.2)            |         |
| N1/N2                    | 5 (31.2)              | 8 (13.8)             |         |
| Papillary feature        |                       |                      | 0.218   |
| Absent                   | 7 (43.8)              | 15 (25.9)            |         |
| Present                  | 9 (56.2)              | 43 (74.1)            |         |
| Tumor grade              |                       |                      | 0.335   |
| Low                      | 0 (0)                 | 7 (12.1)             |         |
| High                     | 16 (100)              | 51 (87.9)            |         |
| Lymphovascular invasion  |                       |                      | 0.876   |
| Absent                   | 10 (62.5)             | 35 (60.3)            |         |
| Present                  | 6 (37.5)              | 23 (39.7)            |         |
| Concomitant CIS          |                       |                      | 0.768   |
| Absent                   | 7 (43.8)              | 23 (39.7)            |         |
| Present                  | 9 (56.2)              | 35 (60.3)            |         |
| Squamous differentiation |                       |                      | 0.763   |
| Absent                   | 11 (68.8)             | 42 (72.4)            |         |
| Present                  | 5 (31.2)              | 16 (27.6)            |         |
| Margin positive          |                       |                      | 1.000   |
| Negative                 | 14 (87.5)             | 49 (84.5)            |         |
| Positive                 | 2 (12.5)              | 9 (15.5)             |         |

Supplementary table 1 (continued). Association of PD-L1 expression with clinicopathological characteristics in a subset of 74 patients with UTUC

|                          |           |           |        |
|--------------------------|-----------|-----------|--------|
| Tumor necrosis           |           |           | 0.35   |
| Absent                   | 7 (43.8)  | 33 (56.9) |        |
| Present                  | 9 (56.2)  | 25 (43.1) |        |
| Multifocal tumor         |           |           | 0.762  |
| Solitary                 | 12 (75)   | 39 (67.2) |        |
| Multifocal               | 4 (25)    | 19 (32.8) |        |
| Bladder recurrence       |           |           | 0.031* |
| Yes                      | 0 (0)     | 15 (25.9) |        |
| No                       | 16 (100)  | 43 (74.1) |        |
| Locoregional recurrence  |           |           | 0.366  |
| Yes                      | 6 (37.5)  | 15 (25.9) |        |
| No                       | 10 (62.5) | 43 (74.1) |        |
| Distant metastasis       |           |           | 1.000  |
| Yes                      | 3 (18.8)  | 13 (22.4) |        |
| No                       | 13 (81.2) | 45 (77.6) |        |
| Adjuvant chemotherapy    |           |           | 1.000  |
| Yes                      | 1 (6.2)   | 5 (8.6)   |        |
| No                       | 15 (93.8) | 53 (91.4) |        |
| Palliative chemotherapy  |           |           | 0.64   |
| Yes                      | 2 (12.5)  | 5 (8.6)   |        |
| No                       | 14 (87.5) | 53 (91.4) |        |
| Palliative immunotherapy |           |           | 0.001* |
| Yes                      | 5 (31.2)  | 1 (1.7)   |        |
| No                       | 11 (68.8) | 57 (98.3) |        |
| Overall death            | 8 (50)    | 37 (63.8) | 0.39   |
| Death due to UTUC        | 6 (37.5)  | 16 (27.6) | 0.539  |

CIS, carcinoma *in situ*; \* indicates  $p < 0.05$
