# Supplementary material
Source: PubMed Central journal article supplement (PMC10992487)
Supplement: 262_2021_2890_MOESM2_ESM.pdf [file 262_2021_2890_MOESM2_ESM.pdf]

Supplementary table 2. Univariable and multivariable analyses by forward stepwise selection of clinicopathological features for the prediction of CSS and OS in a subset of 74 patients with UTUC

|                          | Cancer-specific survival |         |                  |         | Overall survival |         |                  |         |
|--------------------------|--------------------------|---------|------------------|---------|------------------|---------|------------------|---------|
|                          | Univariable              |         | Multivariable*   |         | Univariable      |         | Multivariable*   |         |
|                          | HR (95% CI)              | p value | HR (95% CI)      | p value | HR (95% CI)      | p value | HR (95% CI)      | p value |
| Age (year)               |                          |         |                  |         |                  |         |                  |         |
| > 65 vs. ≤ 65            | 1.75 (0.68–4.51)         | 0.249   |                  |         | 2.56 (1.25–5.25) | 0.01    | 2.56 (1.25–5.25) | 0.01    |
| PD-L1 expression         |                          |         |                  |         |                  |         |                  |         |
| CPS ≥ 10 vs. < 10        | 1.98 (0.77–5.13)         | 0.159   |                  |         | 0.97 (0.45–2.12) | 0.947   |                  |         |
| T stage                  |                          | 0.014   |                  |         |                  | 0.30    |                  |         |
| Ta/is                    | Referent                 |         |                  |         | Referent         |         |                  |         |
| T1                       | 0.84 (0.12–6.04)         | 0.864   |                  |         | 0.74 (0.24–2.33) | 0.611   |                  |         |
| T2                       | 1.47 (0.24–8.91)         | 0.676   |                  |         | 1.43 (0.51–3.98) | 0.499   |                  |         |
| T3                       | 2.70 (0.58–12.6)         | 0.208   |                  |         | 1.58 (0.62–4.05) | 0.338   |                  |         |
| T4                       | 8.21 (1.62–41.5)         | 0.011   |                  |         | 2.38 (0.76–7.47) | 0.136   |                  |         |
| Lymph node status        |                          |         |                  |         |                  |         |                  |         |
| N1/N2 vs. N0/Nx          | 5.73 (2.36–13.9)         | < 0.001 | 6.92 (2.76–17.4) | < 0.001 | 2.32 (1.12–4.79) | 0.023   |                  |         |
| Adjuvant chemotherapy    |                          |         |                  |         |                  |         |                  |         |
| Yes vs. No               | 3.45 (1.25–9.53)         | 0.017   |                  |         | 1.70 (0.66–4.39) | 0.27    |                  |         |
| Palliative chemotherapy  |                          |         |                  |         |                  |         |                  |         |
| Yes vs. No               | 2.92 (1.07–7.98)         | 0.037   | 4.06 (1.42–11.6) | 0.009   | 1.27 (0.50–3.22) | 0.622   |                  |         |
| Palliative immunotherapy |                          |         |                  |         |                  |         |                  |         |
| Yes vs. No               | 3.97 (1.08–14.5)         | 0.037   |                  |         | 1.69 (0.51–5.68) | 0.393   |                  |         |

\* Variables significant on univariable analysis were included to perform multivariable analysis by forward stepwise selection.
